# Supplementary material
Source: Springer Nature journal article supplement (https://www.springermedizin.de/resource/supplementary/12943_2009_609_MOESM6_ESM.pdf/9555106)

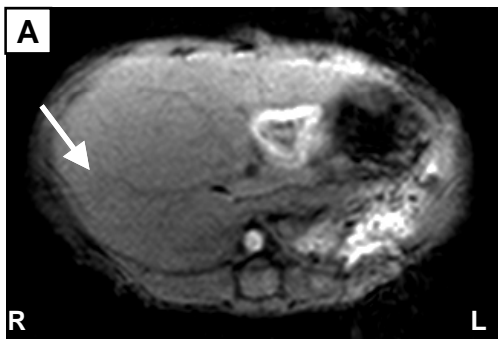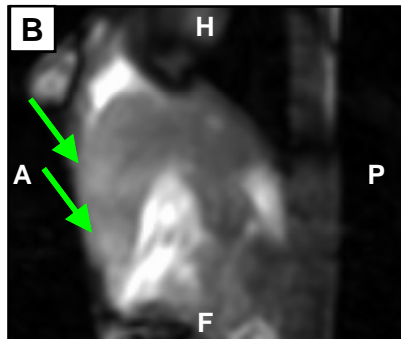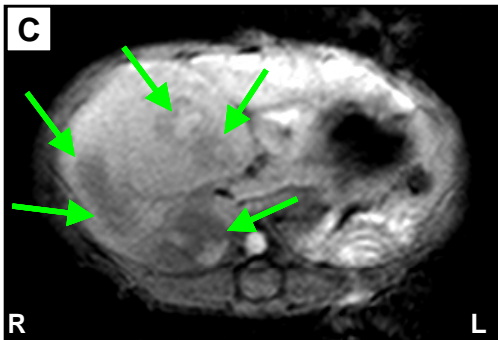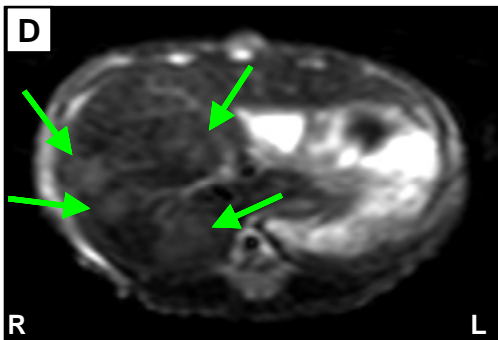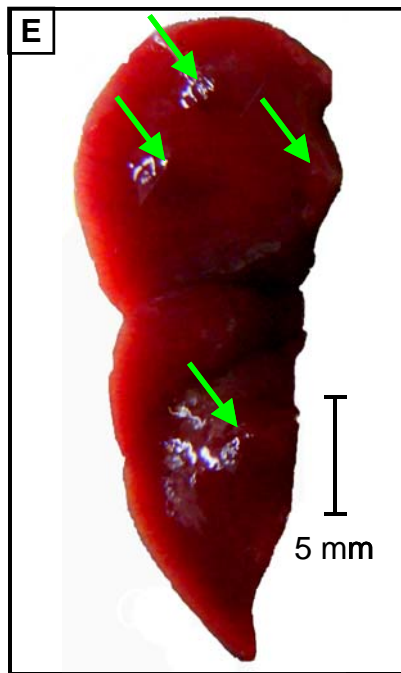

Supplement: MOESM6 [file 9555106]
